# Supplementary material for: Light-driven carbon dioxide reduction over the Ag-decorated modified TS-1 zeolite
Source: Royal Society of Chemistry journal article supplement (doi:10.1039/d1cy02126e), 2022-01-01
Supplement: d1cy02126e1.pdf [file d1cy02126e1.pdf]

# Light-driven carbon dioxide reduction on the Ag-decorated modified zeolite TS-1

Guohui Li<sup>a</sup>, Min Wang<sup>c</sup>, Hengyang Shao<sup>a</sup>, Wenqing Liu<sup>a</sup>, Sicong Yang<sup>a</sup>,  
Wei Sun<sup>a\*</sup>, Tatsumi Ishihara<sup>b</sup>, Yuanyuan Sun<sup>a,b\*</sup>, and Xiaoxia Zhou<sup>c</sup>

<sup>a</sup> Key Laboratory of Laser Technology and Optoelectronic Functional  
Materials of Hainan Province, Key Laboratory of Functional Materials  
and Photoelectrochemistry of Haikou, College of Chemistry and  
Chemical Engineering, Hainan Normal University, No.99 South  
Longkun Road, Haikou 571158, China

<sup>b</sup> International Institute for Carbon Neutral Energy Research (WPI-  
I2CNER), Kyushu University, 744 Motooka, Nishi-ku, Fukuoka, 819-  
0395, Japan

<sup>c</sup> State Key Laboratory of High Performance Ceramics and Superfine  
Microstructures, Shanghai Institute of Ceramics, Chinese Academy of  
Sciences, 1295 Dingxi Road, Shanghai 200050, PR China

**Table S1.** The total pore volume, specific surface, pore size parameters and Ti, Cu and Ag contents of the as-obtained Cu-TS-1 and Ag/Cu-TS-1 samples.

| Samples    | $V_{total}/[\text{cm}^3\text{g}^{-1}]$ | $S_{total}/[\text{m}^2\text{g}^{-1}]$ | $D_{pore}/[\text{nm}]$ | Ti/[at. %] | Cu/[at. %] | Ag/[at. %] |
|------------|----------------------------------------|---------------------------------------|------------------------|------------|------------|------------|
| Cu-TS-1    | 0.21                                   | 379                                   | 1.6, 3.8               | 2.10       | 0.49       | -          |
| Ag/Cu-TS-1 | 0.20                                   | 377                                   | 1.5, 3.8               | 1.61       | 0.41       | 0.24       |

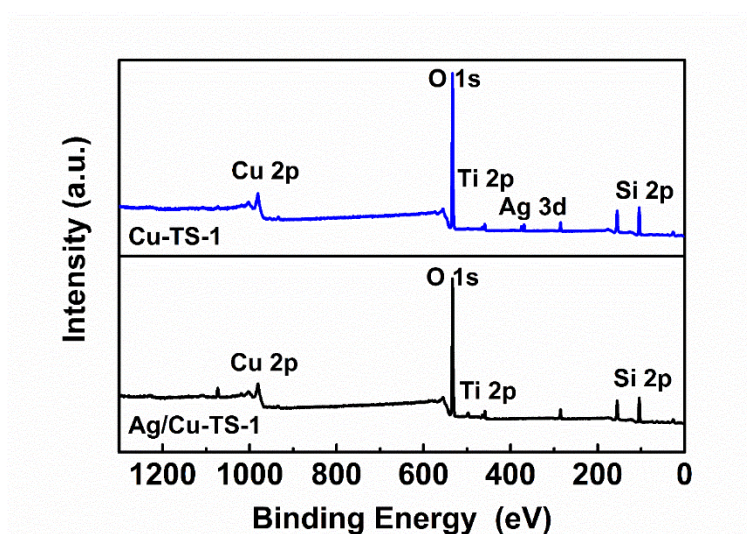

**Figure S1.** The X-ray photoelectron spectroscopy (XPS) spectra of the Cu-TS-1 and Ag/Cu-TS-1 samples

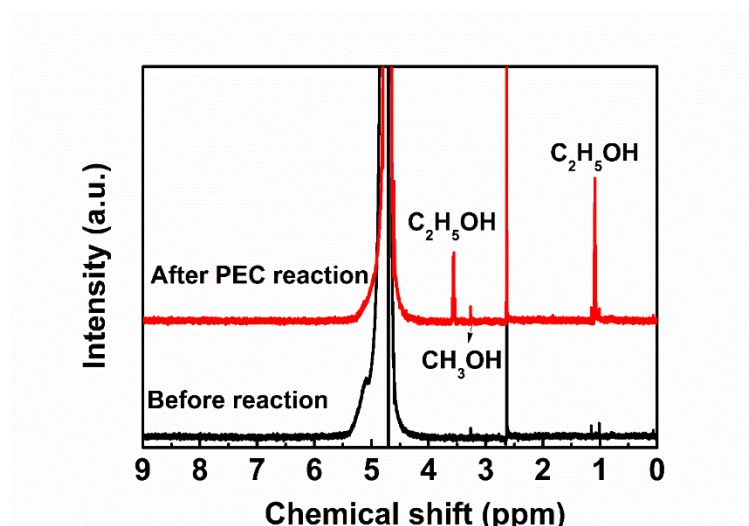

**Figure S2.** H-NMR spectra of Ag/Cu-TS-1 before and after photoelectrochemical (PEC) CO<sub>2</sub> reduction

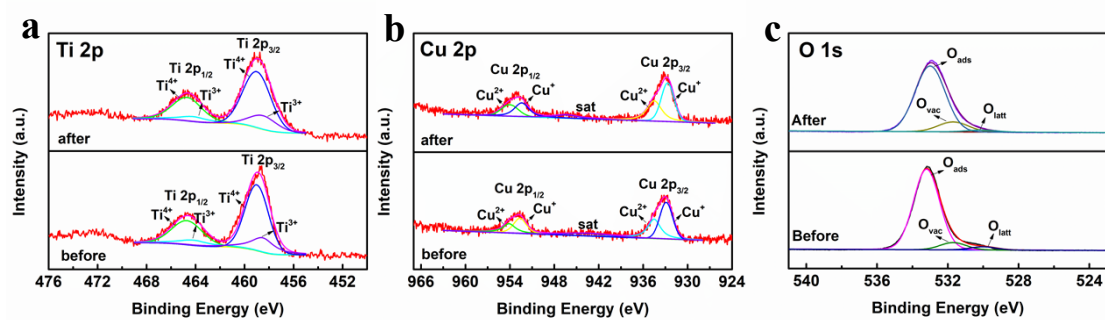

**Figure S3.** The X-ray photoelectron spectroscopy (XPS) spectra of the Ag/Cu-TS-1 sample before and after photoelectrocatalytic reaction
